# Supplementary material for: New coordination polymer networks based on copper(ii) hexafluoroacetylacetonate and pyridine containing building blocks: synthesis and structural study
Source: Royal Society of Chemistry journal article supplement (doi:10.1039/b604591j), 2006-01-01
Supplement: b604591j.pdf [file b604591j.pdf]

**New coordination polymer networks based on Copper(II)  
hexafluoroacetylacetonate and pyridine containing building  
blocks: synthesis and structural study**

**Silke Winter,<sup>[a]</sup> Edwin Weber,<sup>\* [a]</sup> Lars Eriksson<sup>[b]</sup> and Ingeborg Csöreg<sup>\* [b]</sup>**

---

**SUPPORTING INFORMATION**

---

[a] Prof. Dr. E. Weber, Dr. S. Winter  
Institut für Organische Chemie, TU Bergakademie Freiberg  
Leipziger Str. 29, D-09596 Freiberg/Sachsen (Germany)  
Fax: (+49) 3731-393710  
E-mail: edwin.weber@chemie.tu-freiberg.de

[b] Prof. Dr. I. Csöreg, Dr. L. Eriksson  
Department of Structural Chemistry, Arrhenius Laboratory, Stockholm University  
S-10691 Stockholm (Sweden)  
Fax: (+46) 8 163118  
E-mail: ics@struc.su.se

Table S1. Geometric details of possible (C–)H...O/F interactions<sup>[a]</sup> and selected C...F/C inter-chain contact distances<sup>a, b</sup> in complex **A**.

| Atoms involved     | Symmetry            | Distance [Å] |      |         | Angle [°] |
|--------------------|---------------------|--------------|------|---------|-----------|
|                    |                     | C...O/F/C    | C–H  | H...O/F | C–H...O/F |
| C(1)–H(1)...O(3)   | $x, -y+0.5, -x+1.5$ | 3.074(6)     | 0.93 | 2.51    | 119       |
| C(2)–H(2)...F(1)   | $x-0.5, -y, -z+1$   | 3.448(7)     | 0.93 | 2.52    | 174       |
| C(4)–H(4)...F(2)   | $x-1, y, z$         | 3.378(7)     | 0.93 | 2.78    | 123       |
| C(5)–H(5)...F(4)   | $x-0.5, -y+1, z$    | 3.437(9)     | 0.93 | 2.68    | 139       |
| C(13)–H(13)...F(2) | $-x, -y, -z+1$      | 3.576(7)     | 0.93 | 2.98    | 123       |
| C(7)...F(1)        | $x-1, y, z$         | 3.291(6)     |      |         |           |
| C(8)...F(1)        | $x-1, y, z$         | 3.373(5)     |      |         |           |
| C(13)...F(1)       | $-x, -y, -z+1$      | 3.302(7)     |      |         |           |
| C(14)...F(1)       | $-x, -y, -z+1$      | 3.348(5)     |      |         |           |
| C(2)...C(10)       | $x+0.5, -y, z$      | 3.562(7)     |      |         |           |
| C(7)...C(8)        | $-x-0.5, y, -z+1$   | 3.589(6)     |      |         |           |

<sup>a</sup> Esd's, where given, are in parentheses. The (C–)H atoms were held in positions calculated using geometric evidence.<sup>47</sup> The distances/angles have been calculated without correction or normalization of the H positions.

<sup>b</sup> Shorter connections with C...F < 3.4 and C...C < 3.6 Å were selected.

Table S2. Dihedral angles,<sup>a</sup> formed by the pyridyl rings with the central benzene ring plane within the tris(pyridylethynyl)benzene ligand moieties in compounds **C** and **D**.

| Compounds                     | Dihedral angles [°] involving the LS planes <sup>a</sup> of the benzene ring and |                             |                             |                      |
|-------------------------------|----------------------------------------------------------------------------------|-----------------------------|-----------------------------|----------------------|
|                               | pyridyl ring 1 <sup>b</sup>                                                      | pyridyl ring 2 <sup>b</sup> | pyridyl ring 3 <sup>b</sup> |                      |
| Complex <b>C</b> <sup>c</sup> | A                                                                                | 8.20(3)                     | 4.95(3)                     | 7.21(3)              |
|                               | B                                                                                | 73.69(3)                    | 5.23(3)                     | 11.66(3)             |
|                               | C                                                                                | 81.77(3)                    | 5.10(3)                     | 13.61(3)             |
|                               | D                                                                                | 9.06(3)                     | 5.17(3)                     | 7.56(3)              |
|                               | E                                                                                | 81.67(3)                    | 6.49(3)                     | 13.28(3)             |
|                               | F                                                                                | 78.59(3)                    | 4.07(3)                     | 11.95(3)             |
| Complex <b>D</b>              |                                                                                  | 78.1(1)                     | 3.7(2)                      | 22.0(7)              |
|                               |                                                                                  |                             |                             | 52.8(5) <sup>d</sup> |

<sup>a</sup> The least square (LS) planes were calculated through the non-hydrogen ring atoms. Esd's are given in parentheses.

<sup>b</sup> Pyridyl rings 1, 2 and 3 contain the heteroatoms N(1), N(2) and N(3), respectively.

<sup>c</sup> Complex **C** contains six unique tris(pyridylethynyl)benzene spacer units A-F.

<sup>d</sup> Pyridyl ring 3 in complex **D** was found to be disordered, occupying two major disorder sites (Fig. 5) with about the same probability (*cf.* the text).

Table S3. Distances and angles in possible (C–)H...N (a) and (C–)Cl... $\pi_{\text{ethynyl}}$  interactions (b), <sup>a, b</sup> and selected contact distances <sup>c</sup> between the polymeric **D** host framework and the included chloroform guest molecule (c).

(a)

| Atoms involved         | Symmetry       | Distance [Å] |      |       | Angle [°] |
|------------------------|----------------|--------------|------|-------|-----------|
|                        |                | C...N        | C–H  | H...N | C–H...N   |
| C(1G)–H(1G)···N(3)     | <i>x, y, z</i> | 3.12(1)      | 0.99 | 2.22  | 151       |
| C(1G')–H(1G')···N(3)   | <i>x, y, z</i> | 3.27(2)      | 1.00 | 2.38  | 149       |
| C(1G)–H(1G)···N(3')    | <i>x, y, z</i> | 3.04(1)      | 0.99 | 2.13  | 153       |
| C(1G')–H(1G')···N(3')  | <i>x, y, z</i> | 3.17(2)      | 1.00 | 2.19  | 168       |
| C(1G'')–H(1G'')···N(3) | <i>x, y, z</i> | 3.35(3)      | 0.98 | 2.52  | 142       |

(b)

| Atoms involved                                             | Symmetry                 | Distance [Å]                              | Angle [°]                                   |
|------------------------------------------------------------|--------------------------|-------------------------------------------|---------------------------------------------|
|                                                            |                          | Cl... $\pi_{\text{ethynyl}}$ <sup>c</sup> | C–Cl... $\pi_{\text{ethynyl}}$ <sup>c</sup> |
| C(1G)–Cl(1)··· $\pi_{\text{ethynyl}}$ (3) <sup>b</sup>     | $-x - I, -y - I, -z - I$ | 3.561(8)                                  | 151.0(8)                                    |
| C(1G')–Cl(2')··· $\pi_{\text{ethynyl}}$ (1) <sup>b</sup>   | <i>x, y, z + I</i>       | 3.219(6)                                  | 152.6(7)                                    |
| C(1G'')–Cl(3'')··· $\pi_{\text{ethynyl}}$ (3) <sup>b</sup> | $-x, -y - I, -z - I$     | 3.39(1)                                   | 147(2)                                      |

(c)

| Atoms involved  | Symmetry           | Distance [Å] |
|-----------------|--------------------|--------------|
| Cl(1')...F(11)  | $x, y+I, z-I$      | 3.208(9)     |
| C(8)...Cl(3'')  | $x, y, z+I$        | 3.67(2)      |
| C(9)...Cl(2')   | $x, y, z+I$        | 3.481(6)     |
| C(12)...Cl(1')  | $x+I, y, z+I$      | 3.477(8)     |
| C(13)...Cl(1')  | $x+I, y, z+I$      | 3.364(8)     |
| C(21)...Cl(1)   | $-x-I, -y-I, -z-I$ | 3.636(9)     |
| C(22)...Cl(3'') | $-x, -y-I, -z-I$   | 3.15(2)      |
| C(22)...Cl(1)   | $-x-I, -y-I, -z-I$ | 3.59(1)      |
| C(29)...Cl(2'') | $-x+I, -y, -z$     | 3.54(2)      |
| Cl(3')...F(2)   | $x-I, y-I, z-I$    | 3.115(8)     |
| Cl(1)...F(2)    | $x-I, y-I, z-I$    | 3.351(9)     |
| Cl(2'')...F(1)  | $-x+I, y, z$       | 3.30(2)      |
| Cl(1)...F(1)    | $x-I, y-I, z-I$    | 3.397(7)     |
| Cl(2'')...F(2)  | $-x+I, -y, -z$     | 3.37(2)      |
| Cl(3)...F(4)    | $x-I, y, z-I$      | 3.283(7)     |
| Cl(1')...F(4)   | $x, y+I, z-I$      | 3.474(9)     |
| Cl(3)...F(11)   | $-x-I, -y-I, -z$   | 3.336(7)     |

<sup>a</sup> Esd's, where given, are in parentheses. The chloroform (C-)H disorder sites were held riding on their parent C atoms during the final refinement calculations. The distances/angles have been calculated without correction or normalization of the H positions.

<sup>b</sup>  $\pi_{\text{ethynyl}}$  means the center of gravity of the ethynyl C $\equiv$ C bond,<sup>29</sup> where bonds (1), (2) and (3) are those between C(7) and C(8), C(14) and C(15), and C(21) and C(22), respectively (Figure 5).

<sup>c</sup> Shorter contacts with distances C...Cl < 3.7, Cl...F < 3.5 and Cl... $\pi$  < 3.6 Å were selected, where at least one of the two connected atoms have full site occupancy.

Table S4. Geometry of possible (C–)H...F (a) and (C–)F... $\pi_{\text{ethynyl}}$  (b) interactions,<sup>a, b, c</sup> and selected inter-chain contact distances<sup>b, c, d, e</sup> (c) in complex **D**.

(a)

| Atoms involved     | Symmetry      | Distance [Å] |      |       | Angle [°] |
|--------------------|---------------|--------------|------|-------|-----------|
|                    |               | C...N        | C–H  | H...N | C–H...N   |
| C(10)–H(10)...F(4) | $x-l, y, z$   | 3.538(5)     | 0.93 | 2.93  | 125       |
| C(26)–H(26)...F(5) | $x-l, y, z-l$ | 3.603(11)    | 0.93 | 2.83  | 142       |

(b)

| Atoms involved                                          | Symmetry         | Distance [Å]                | Angle [°]                     |
|---------------------------------------------------------|------------------|-----------------------------|-------------------------------|
|                                                         |                  | F... $\pi_{\text{ethynyl}}$ | C–F... $\pi_{\text{ethynyl}}$ |
| C(37)–F(11) ... $\pi_{\text{ethynyl}}$ (2) <sup>c</sup> | $-x-l, -y-2, -z$ | 3.502(5)                    | 119.2(4)                      |
| C(33)–F(7) ... $\pi_{\text{ethynyl}}$ (2) <sup>c</sup>  | $-x-l, -y-2, -z$ | 3.729(5)                    | 110.8(4)                      |

(c)

| Atoms involved | Symmetry         | Distance [Å] |
|----------------|------------------|--------------|
| C(9)···F(11)   | $x+1, y+1, z$    | 3.353(5)     |
| C(10)···F(12)  | $x+1, y+1, z$    | 3.182(6)     |
| C(10)···F(6)   | $x-1, y, z$      | 3.479(5)     |
| C(11)···F(6)   | $x-1, y, z$      | 3.277(5)     |
| C(11)···F(12)  | $x+1, y+1, z$    | 3.154(5)     |
| C(13)···F(11)  | $x+1, y+1, z$    | 3.329(5)     |
| C(17)···F(7)   | $-x-1, -y-2, -z$ | 3.201(5)     |
| C(20)···F(10)  | $-x-1, -y-2, -z$ | 3.226(5)     |
| C(21)···F(9)   | $x+1, y+1, z$    | 3.368(5)     |
| C(22)···F(9)   | $x+1, y+1, z$    | 3.212(6)     |
| C(23)···F(1)   | $-x, -y, -z$     | 3.40(2)      |
| C(24)···F(1)   | $-x, -y, -z$     | 3.21(2)      |
| C(25)···F(1)   | $-x, -y, -z$     | 3.27(2)      |
| C(25)···F(1)   | $x+1, y+1, z+1$  | 3.305(9)     |
| C(27)···F(3)   | $-x, -y, -z$     | 3.30(2)      |
| C(27')···F(3)  | $-x, -y, -z$     | 3.42(2)      |

Table S4 (cont.)

| Atoms involved                                             | Symmetry         | Distance [Å] |
|------------------------------------------------------------|------------------|--------------|
| C(29)···F(12)                                              | $x+1, y+1, z$    | 3.278(5)     |
| C(30)···F(12)                                              | $x+1, y+1, z$    | 3.416(6)     |
| C(10)···O(4)                                               | $x+1, y+1, z$    | 3.376(5)     |
| C(1)···C(6)                                                | $-x, -y-1, -z$   | 3.469(5)     |
| C(1)···C(5)                                                | $-x, -y-1, -z$   | 3.559(5)     |
| C(1)···C(20)                                               | $-x-1, -y-1, -z$ | 3.484(5)     |
| C(1)···C(16)                                               | $-x-1, -y-1, -z$ | 3.584(5)     |
| C(2)···C(6)                                                | $-x, -y-1, -z$   | 3.528(5)     |
| C(3)···C(15)                                               | $-x-1, -y-1, -z$ | 3.543(5)     |
| C(4)···C(7)                                                | $-x, -y-1, -z$   | 3.572(5)     |
| C(5)···C(7)                                                | $-x, -y-1, -z$   | 3.508(5)     |
| C(5)···C(17)                                               | $-x-1, -y-1, -z$ | 3.405(5)     |
| C(6)···C(17)                                               | $-x-1, -y-1, -z$ | 3.462(5)     |
| C(6)···C(18)                                               | $-x-1, -y-1, -z$ | 3.456(5)     |
| C(7)···C(19)                                               | $-x-1, -y-1, -z$ | 3.504(5)     |
| C(7)···C(20)                                               | $-x-1, -y-1, -z$ | 3.568(5)     |
| C(14)···C(14)                                              | $-x-1, -y-1, -z$ | 3.576(7)     |
| $\pi_{\text{aryl}}(1) \cdots \pi_{\text{aryl}}(3)^c$       | $x, y+1, z-1$    | 3.743        |
| $\pi_{\text{ethynyl}}(2) \cdots \pi_{\text{ethynyl}}(2)^c$ | $-x-1, -y-1, -z$ | 3.804        |

<sup>a</sup> Only the most probable C–H···F bonds, with C···F < 3.61 Å and C–H···F angle >120° were selected.

<sup>b</sup> Esd's, where given, are in parentheses. The (C–)H atoms were held in positions calculated using geometric evidence.<sup>47</sup> The distances/angles have been calculated without correction or normalization of the H positions.

<sup>c</sup>  $\pi_{\text{ethynyl}}$  means the center of gravity of the ethynyl C≡C bond,<sup>29</sup> where bonds (1), (2) and (3) are those between C(7) and C(8), C(14) and C(15), and C(21) and C(22), respectively (Figure 5).

<sup>d</sup> Shorter contacts with distances C···F < 3.4, C···O < 3.5 and C···C < 3.6 Å were selected, where at least one of the two connected atoms has full site occupancy.



<sup>e</sup>  $\pi_{\text{aryl}}$  means the ring center of gravity, <sup>29</sup> here calculated for the six-membered rings (1) and (3), where ring (1) is the C(1)–C(2)–C(3)–C(4)–C(5)–C(6) benzene ring; and ring (3) is the C(16)–C(17)–C(18)–N(2)–C(19)–C(20) pyridine ring (Fig. 5).
